# Annals of Oncology

Official Journal of the European Society for  
Medical Oncology and the Japanese Society for Medical Oncology

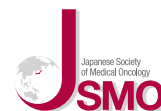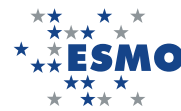

## Volume 19, 2008 Supplement 3

6<sup>th</sup> International Symposium on Targeted Anticancer Therapies

March 20–22, 2008: Bethesda, MD, USA

|                                        |       |                                                            |       |
|----------------------------------------|-------|------------------------------------------------------------|-------|
| Committees                             | iii5  | <b>abstracts</b>                                           |       |
| Welcome to TAT 2008                    | iii6  | Plenary lectures (PL)                                      | iii16 |
| Sponsor & grant acknowledgements       | iii7  | Proffered papers (PP)                                      | iii24 |
| NDDO Research Foundation, ESMO and NCI | iii8  | Posters A: Target identification and validation            | iii26 |
| MDICT Task Force                       | iii9  | Posters B: Drug design, discovery and preclinical profiles | iii28 |
| <b>program</b>                         |       | Posters C: Immunological targets and agents                | iii33 |
| Overview and opening hours             | iii10 | Posters D: Phase 1 studies                                 | iii34 |
| Program, Thursday, March 20            | iii11 | Posters E: Phase 2 and 3 studies                           | iii36 |
| Program, Friday March 21               | iii12 | Posters F: Molecular diagnosis and patient selection       | iii39 |
| Program, Saturday, March 22            | iii13 | Posters G: Biomarker development and validation            | iii42 |
| Poster titles and authors              | iii14 | Posters H: Tyrosine kinase inhibitors                      | iii43 |
|                                        |       | Author index                                               | iii45 |
